# Supplementary material for: Synthesis of multicolor-emitting nitrogen–sulfur co-doped carbon dots and their photochemical studies for sensing applications
Source: Royal Society of Chemistry journal article supplement (doi:10.1039/d2ra03073j), 2022-01-01
Supplement: d2ra03073j1.pdf [file d2ra03073j1.pdf]

## Supplementary information for

# Synthesis of multicolor-emitting nitrogen–sulfur co-doped carbon dots and their photochemical studies for sensing applications

Manunya Tepakidarekul,<sup>a</sup> Taro Uematsu,<sup>\*a,b</sup> and Susumu Kuwabata<sup>\*a,b</sup>

<sup>a</sup>Department of Applied Chemistry, Graduate School of Engineering, Osaka University, 2-1 Yamada-oka, Suita 565-0871, Japan.

<sup>b</sup>Innovative Catalysis Science Division, Institute for Open and Transdisciplinary Research Initiatives (ICS-OTRI), Osaka University, Suita 565-0871, Japan.

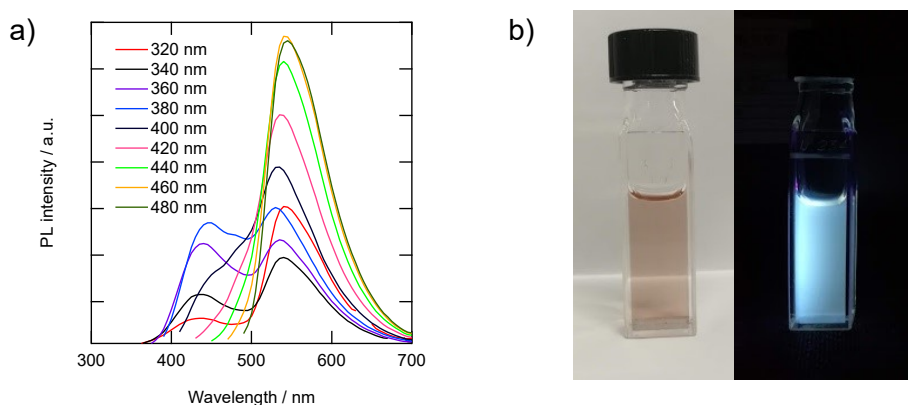

**Figure S1.** Photoluminescence spectra (a) of as-prepared CDs measured in aqueous solution at different excitation wavelengths (pH 7.0) and CD solution as prepared in the presence of ambient light and 365 nm UV light (b) .

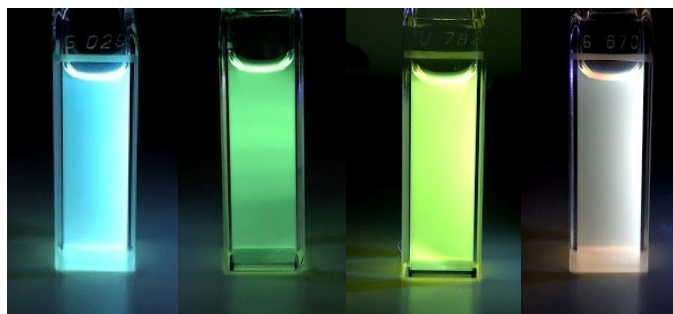

**Figure S2.** The solutions of the b-CDs, g-CDs, y-CDs, and o-CDs under 365 nm UV irradiation.

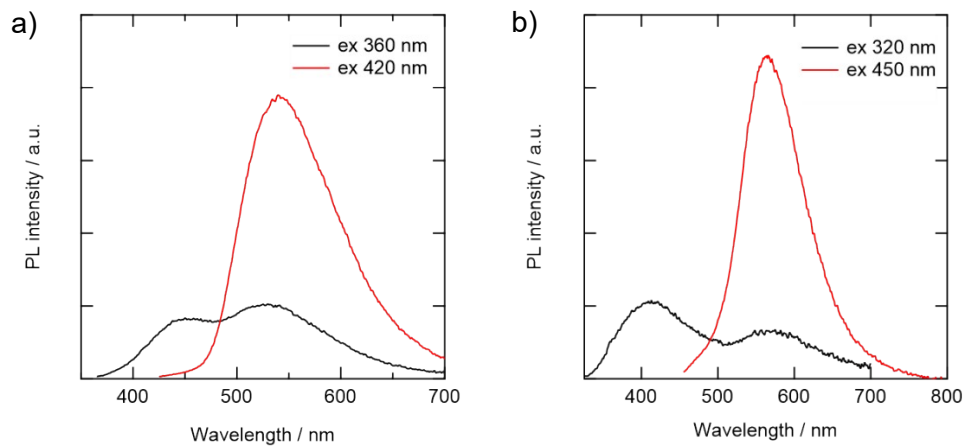

**Figure S3.** Photoluminescence spectra of the g-CDs (a) and  $\gamma$ -CDs (b) were recorded with varied excitation wavelengths in an aqueous solution (pH 7.0).

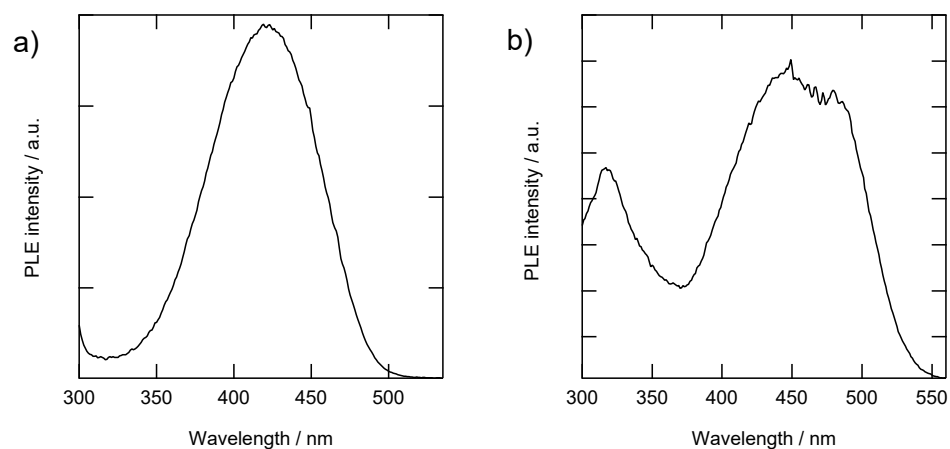

**Figure S4.** Photoluminescence excitation spectra of the g-CDs (a) and  $\gamma$ -CDs (b) were recorded at PL peak wavelengths in an aqueous solution (pH 7.0, 420 nm for g-CDs and 450 nm for  $\gamma$ -CDs).

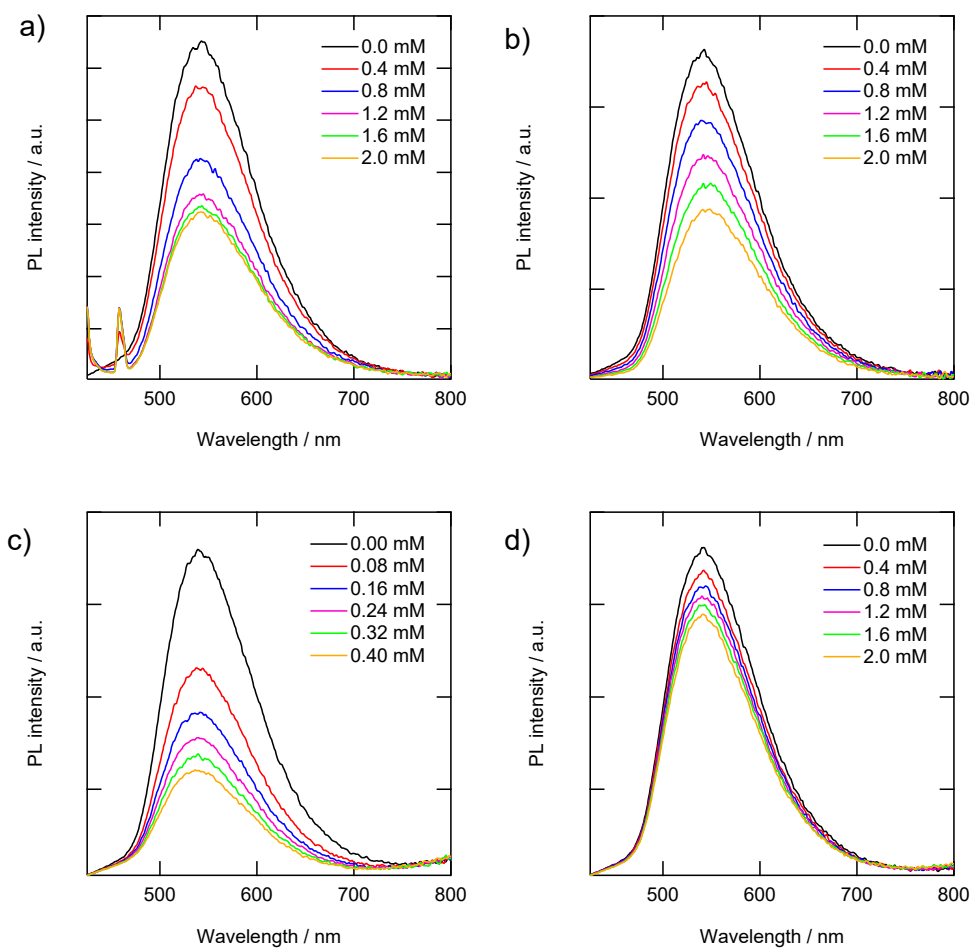

**Figure S5.** Variations in photoluminescence spectra for the g-CDs by the addition of  $\text{Ag}^+$  (a),  $\text{Fe}^{3+}$  (b),  $\text{Cu}^{2+}$  (c), and  $\text{Co}^{2+}$  (d) in aqueous solution (pH 7.0).

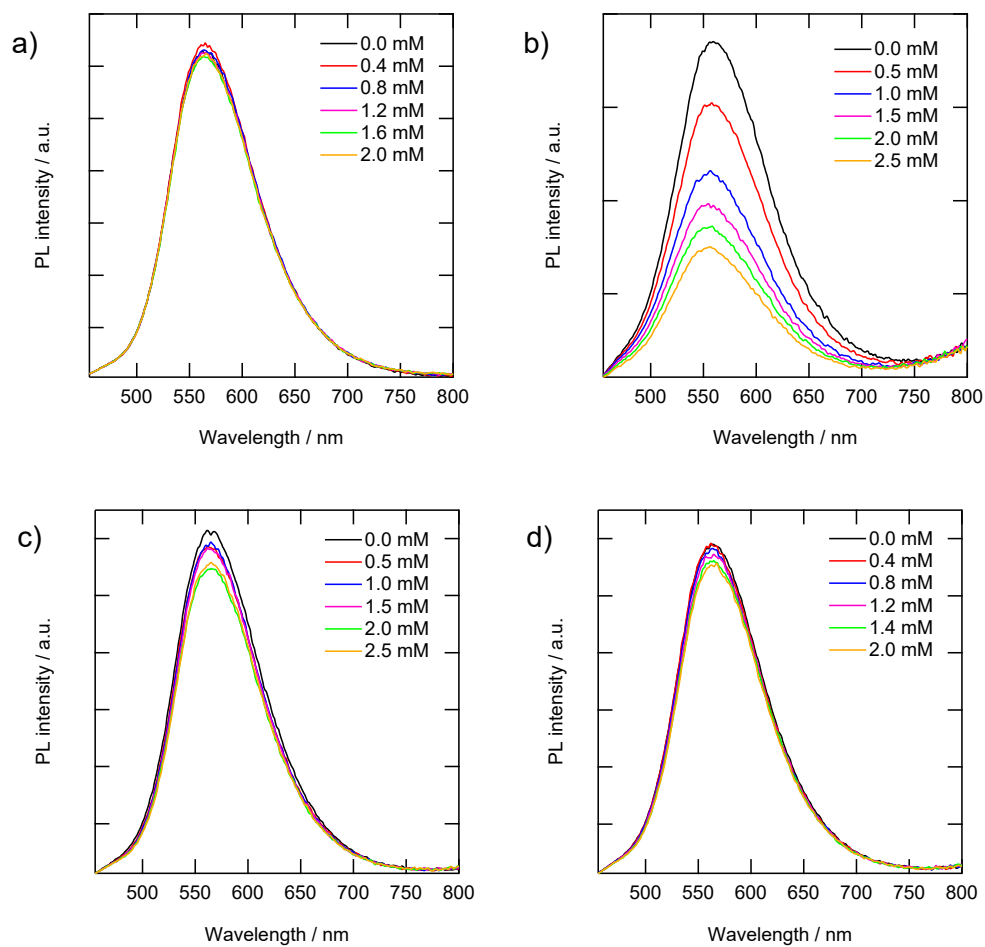

**Figure S6.** Variations in photoluminescence spectra for the  $\gamma$ -CDs due to the addition of  $\text{Ag}^+$  (a),  $\text{Fe}^{3+}$  (b),  $\text{Cu}^{2+}$  (c), and  $\text{Co}^{2+}$  (d) in aqueous solution (pH 7.0).

**Table S1** Optical properties of g-CDs and  $\gamma$ -CDs.

| CDs           | $\lambda_{\text{ex}}$ (nm) | $\lambda_{\text{em}}$ (nm) | Photoluminescence quantum yield (%) |                        |      |                      |
|---------------|----------------------------|----------------------------|-------------------------------------|------------------------|------|----------------------|
|               |                            |                            | $\text{CH}_2\text{Cl}_2$            | $\text{CH}_3\text{CN}$ | MeOH | $\text{H}_2\text{O}$ |
| g-CDs         | 420                        | 540                        | 3                                   | 58                     | 36   | 17                   |
| $\gamma$ -CDs | 450                        | 565                        | 6                                   | 20                     | 15   | 5                    |

### Limit of detection calculations

The limit of detection (LOD) is determined from fluorescence titration data based on the literature. The PL spectra of the g-CDs and  $\gamma$ -CDs were measured 10 times and the standard deviations of these blank measurements (converted to Stern–Volmer type) were obtained. The detection limit was calculated with the following equation:

$$\text{LOD} = 3\sigma/K_S$$

where  $\sigma$  is the standard deviation of the blank measurement and  $K_S$  is the slope between fluorescence intensity versus quencher concentration (Figure 6c and 6d in main text). The  $K_S$  values were found to be  $6645 \text{ M}^{-1}$  and  $917 \text{ M}^{-1}$  for g-CDs and  $\gamma$ -CDs, respectively. Therefore, the detection limit of g-CDs toward  $\text{Cu}^{2+}$  was calculated to be  $10.3 \text{ }\mu\text{M}$  ( $\text{LOD} = 3(0.0229)/6645 = 1.03 \times 10^{-5} \text{ M}$ ). For  $\gamma$ -CDs towards  $\text{Fe}^{3+}$ , the detection limit was calculated to be  $0.11 \text{ mM}$  ( $\text{LOD} = 3(0.0346)/917 = 1.13 \times 10^{-4} \text{ M}$ ).
